# Supplementary material for: Nuclear translocation of vitellogenin in the honey bee (Apis mellifera)
Source: Springer Nature journal article supplement (doi:10.1007/s13592-022-00914-9), 2022-03-01
Supplement: MOESM1 [file 13592_2022_914_MOESM1_ESM.pdf]

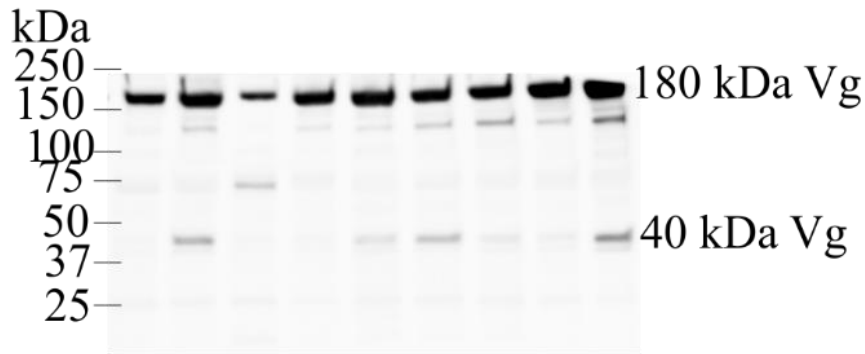

**Fig S1.** Western blot of vitellogenin N-terminal antibody (targeting amino acids 24-360) in honey bee tissue lysate samples. Abdomen of nine winter worker honey bee individuals were homogenized and western blotted (20  $\mu$ g total protein per lane). There is a strong full-length vitellogenin band (180 kDa) in each sample. In addition, there are shorter fragments, whose presence and strength varies in individual samples. The previously identified 40 kDa N-terminal vitellogenin fragment is indicated. The other fragments of unknown function detected by this antibody in some individuals are ~75 kDa and ~125 kDa.
