# Supplementary material for: Nuclear translocation of vitellogenin in the honey bee (Apis mellifera)
Source: Springer Nature journal article supplement (doi:10.1007/s13592-022-00914-9), 2022-03-01
Supplement: MOESM2 [file 13592_2022_914_MOESM2_ESM.pdf]

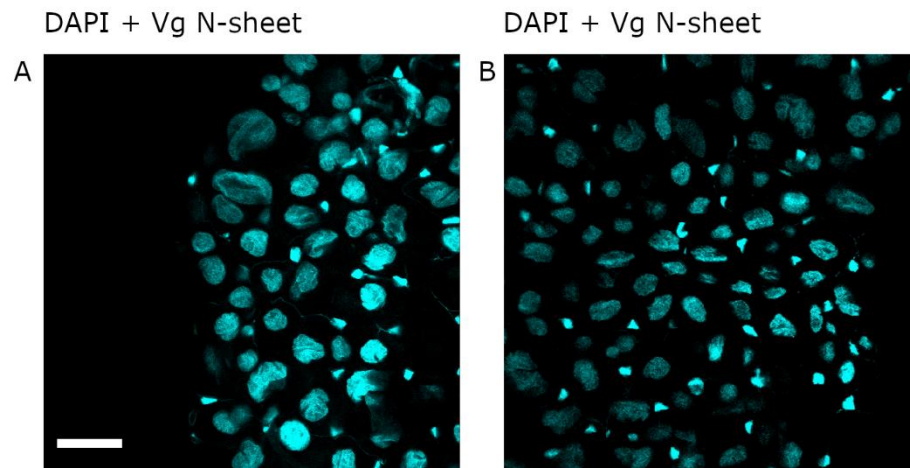

**S2: Staining control for Fig 2.** A-B depict separate biological replicates of honey bee fat body tissue that underwent negative control staining depicted in Fig 2. These samples were incubated *without* the primary antibody for the Vg N-sheet, but *with* the secondary antibody (Alexa 568). Here, the nuclear stain DAPI (cyan) is visible, while the Vg N-sheet stain (red) is absent, indicating that the secondary antibody is specific to the Vg N-sheet antibody. Scalebar = 50  $\mu$ m.
